# Supplementary material
Source: Springer Nature journal article supplement (https://www.springermedizin.de/resource/supplementary/13023_2013_604_MOESM4_ESM.pdf/9642498)

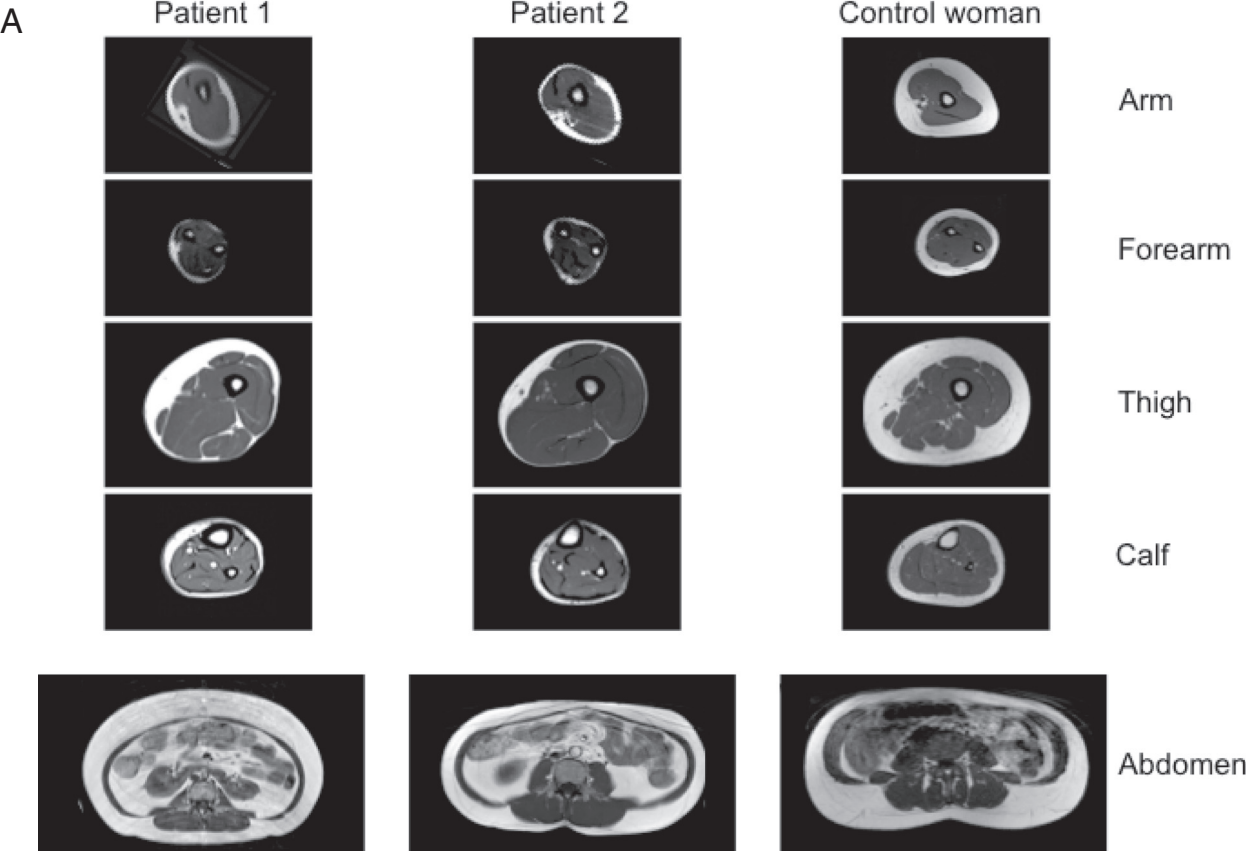

**B**

|  | Patient 1 | Control woman |
|--|-----------|---------------|
|--|-----------|---------------|

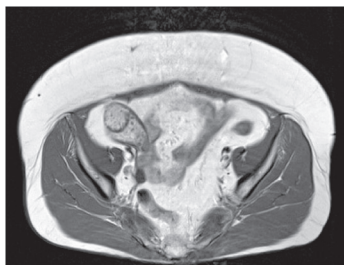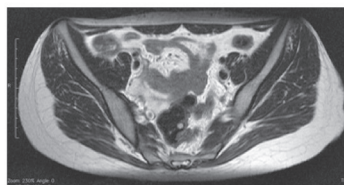

Supplement: MOESM4 [file 9642498]
